# Supplementary material for: Long-Term Effects of Irbesartan Treatment and Smoking on Nucleic Acid Oxidation in Patients With Type 2 Diabetes and Microalbuminuria: An Irbesartan in Patients With Type 2 Diabetes and Microalbuminuria (IRMA 2) substudy
Source: PubMed Central journal article supplement — Diabetes Care. 2011 Apr 20;34(5):1192–8. doi: 10.2337/dc10-2214 (PMC3114487; doi:10.2337/dc10-2214), 2011-04-20
Supplement: supp_dc10-2214v102214_DC102214SupplementaryData.pdf [file supp_dc10-2214v102214_DC102214SupplementaryData.pdf]

SUPPLEMENTARY DATA

**Supplementary Table 1. Additional treatment in patients with type 2 diabetes and microalbuminuria during the two years study period.**

|                          | Placebo<br>(n=17) | Irbesartan 150 mg (n=16) | Irbesartan 300 mg (n=17) | <i>P</i> |
|--------------------------|-------------------|--------------------------|--------------------------|----------|
| Antihypertensive agents  |                   |                          |                          |          |
| Any                      | 15 (88)           | 12 (75)                  | 13 (81)                  | 0.58     |
| Diuretics                | 15 (88)           | 12 (75)                  | 13 (81)                  | 0.58     |
| Beta-blockers            | 8 (47)            | 5 (31)                   | 7 (41)                   | 0.65     |
| Calcium-channel blockers | 4 (24)            | 2 (13)                   | 3 (18)                   | 0.71     |
| Others                   | 3 (18)            | 1 (6)                    | 4 (24)                   | 0.39     |
|                          |                   |                          |                          |          |
| Lipid-lowering agents    |                   |                          |                          |          |
| Any                      | 4 (24)            | 4 (25)                   | 5 (29)                   | 0.92     |
| Statin                   | 4 (24)            | 3 (19)                   | 5 (29)                   | 0.77     |

Data are number (%). Treatments with duration beyond 100 days are included in the analysis.

SUPPLEMENTARY DATA

**Supplementary Table 2. Relationship between changes in 8-oxodG and 8-oxoGuo excretions and other variables.**

| Variable                               | Δ 8-oxodG (%) |                |        | Δ 8-oxoGuo (%) |                |      |
|----------------------------------------|---------------|----------------|--------|----------------|----------------|------|
|                                        | β             | R <sup>2</sup> | P      | β              | R <sup>2</sup> | P    |
| <u>Changes</u>                         |               |                |        |                |                |      |
| ΔUrinary albumin excretion (%)         | 0.413         | 0.179          | 0.014  | 0.023          | 0.0001         | 0.95 |
| ΔWeight (%)                            | -1.729        | 0.125          | 0.04   | 1.690          | 0.035          | 0.30 |
| ΔSystolic blood pressure (%)           | -0.002        | 0.000          | 0.99   | -0.070         | 0.0004         | 0.91 |
| ΔDiastolic blood pressure (%)          | 0.111         | 0.003          | 0.76   | 0.044          | 0.0001         | 0.95 |
| ΔGFR (%)                               | 0.620         | 0.074          | 0.13   | -1.218         | 0.083          | 0.11 |
| ΔHbA <sub>1C</sub> (%)                 | 0.470         | 0.176          | 0.015  | 0.376          | 0.033          | 0.31 |
| ΔHemoglobin (%)                        | 0.984         | 0.098          | 0.08   | -1.606         | 0.075          | 0.12 |
| Δ 8-oxodG (%)                          | -             | -              | -      | -              | -              | -    |
| Δ 8-oxoGuo (%)                         | 0.241         | 0.017          | 0.47   | -              | -              | -    |
| <u>Baseline</u>                        |               |                |        |                |                |      |
| Age (years)                            | -1.142        | 0.144          | 0.03   | 0.172          | 0.000          | 0.86 |
| Urinary albumin excretion (μg/min)     | 0.021         | 0.002          | 0.81   | 0.013          | 0.000          | 0.94 |
| Body- mass index (kg/m <sup>2</sup> )  | 1.723         | 0.096          | 0.08   | 0.747          | 0.005          | 0.69 |
| Weight (kg)                            | 0.571         | 0.098          | 0.08   | 0.523          | 0.024          | 0.39 |
| Known diabetes duration (years)        | -1.166        | 0.093          | 0.09   | 0.561          | 0.006          | 0.66 |
| Systolic blood pressure (mmHg)         | -0.465        | 0.115          | 0.05   | 0.181          | 0.005          | 0.69 |
| Diastolic blood pressure (mmHg)        | 0.440         | 0.040          | 0.27   | 0.275          | 0.004          | 0.71 |
| GFR (ml /min per 1.73 m <sup>2</sup> ) | 0.060         | 0.003          | 0.77   | -0.357         | 0.029          | 0.34 |
| HbA <sub>1C</sub> (%)                  | -2.267        | 0.025          | 0.38   | -3.152         | 0.014          | 0.51 |
| Hemoglobin (mmol/l)                    | -0.981        | 0.002          | 0.78   | 7.640          | 0.044          | 0.24 |
| Cholesterol (mmol/l)                   | -0.118        | 0.061          | 0.17   | -0.223         | 0.063          | 0.16 |
| LDL Cholesterol (mmol/l)               | -0.092        | 0.036          | 0.30   | -0.219         | 0.060          | 0.18 |
| HDL Cholesterol (mmol/l)               | -0.807        | 0.310          | 0.0008 | 0.020          | 0.000          | 0.97 |
| Triglycerides (mmol/l)                 | 0.033         | 0.043          | 0.25   | -0.006         | 0.000          | 0.91 |
| Serum creatinine (μmol/l)              | 15.954        | 0.010          | 0.57   | 77.924         | 0.071          | 0.13 |
| 8-oxodG (nmol/mmol creat)              | -10.744       | 0.264          | 0.002  | -4.732         | 0.015          | 0.50 |
| 8-oxoGuo (nmol/mmol creat)             | -3.305        | 0.041          | 0.26   | -4.948         | 0.027          | 0.36 |

GFR: Glomerular filtration rate, HbA<sub>1C</sub>: Glycosylated hemoglobin, 8-oxodG: 8-oxo-7,8-dihydro-2'-deoxyguanosine, 8-oxoGuo: 8-oxo-7,8-dihydroguanosine.
